# Supplementary material for: Confined benzene within InOF-1: contrasting CO2and SO2capture behaviours
Source: Royal Society of Chemistry journal article supplement (doi:10.1039/c9dt04667d), 2020-01-01
Supplement: c9dt04667d1.pdf [file c9dt04667d1.pdf]

# Electronic Supplementary Information

## Confined benzene within InOF-1: contrasting CO<sub>2</sub> and SO<sub>2</sub> capture behaviours

Luz J. Barrios-Vargas,<sup>†a</sup> José G. Ruiz-Montoya,<sup>†b</sup> Bruno Landeros-Rivera,<sup>c</sup> J. Raziel Álvarez,<sup>a</sup> Daniel Alvarado-Alvarado,<sup>a</sup> Rubicelia Vargas,<sup>\*c</sup> Ana Martínez,<sup>d</sup> Eduardo González-Zamora,<sup>c</sup> Ludy M. Cáceres,<sup>c</sup> Juan C. Morales<sup>\*c,b</sup> and Ilich A. Ibarra<sup>\*a</sup>

a. Laboratorio de Físicoquímica y Reactividad de Superficies (LaFReS), Instituto de Investigaciones en Materiales, Universidad Nacional Autónoma de México, Circuito Exterior s/n, CU, Coyoacán, 04510 Ciudad de México, Mexico. E-mail: argel@unam.mx

b. Laboratorio de Investigación de Electroquímica Aplicada, Facultad de Ciencias, Universidad Nacional de Ingeniería, Av. Túpac Amaru 210, Rímac, Lima, Perú.

c. Departamento de Química, Universidad Autónoma Metropolitana-Iztapalapa, San Rafael Atlixco 185, Col. Vicentina, Iztapalapa, C. P. 09340 Ciudad de México. E-mail: brunolanderos@hotmail.com; ruvf@xanum.uam.mx

d. Instituto de Investigaciones en Materiales, Universidad Nacional Autónoma de México, Circuito Exterior S/N, CU, Del. Coyoacán, 04510, Ciudad de México, México.

e. Facultad de Ingeniería y Arquitectura, Universidad de Lima, Avenida Javier Prado Este 4600, Santiago de Surco, Lima 1503, Perú. E-mail: jcmorale@ulima.edu.pe

\* Corresponding Authors

E-mail: argel@unam.mx, jcmorale@ulima.edu.pe and ruvf@xanum.uam.mx

<sup>†</sup> These authors contributed equally to this work.

## 1. Crystal Structure of InOF-1

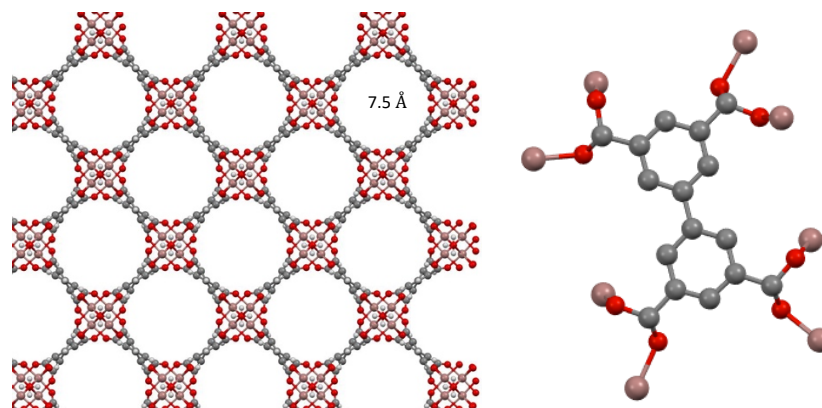

**Fig. S1.** (left) crystal structure of InOF-1 along the *c* axis showing 7.5 Å channels; and right (view) of the coordination at In(III) in InOF-1, showing [BPTC]<sup>4-</sup> and the  $\mu_2$ -OH group.

## 2. Experimental Details

### Chemicals

Indium nitrate ( $\text{In}(\text{NO}_3)_3$ ), biphenyl-3,3',5,5'-tetracarboxylic acid ( $\text{H}_4\text{BPTC}$ ), *N,N*-dimethylformamide (DMF), acetonitrile ( $\text{CH}_3\text{CN}$ ), nitric acid (65%,  $\text{HNO}_3$ ), anhydrous ethanol (<0.005% water) and ethanol (reagent grade alcohol, 95%) were purchased from Sigma-Aldrich and used as received.

### Synthesis of InOF-1

InOF-1 ( $\text{In}_2(\text{OH})_2(\text{BPTC}) \cdot 6\text{H}_2\text{O}$ ) was synthesized according to previously reported procedure:<sup>2</sup>  $\text{In}(\text{NO}_3)_3$  (156 mg, 0.40 mmol) and  $\text{H}_4\text{BPTC}$  (33 mg, 0.10 mmol) were dissolved in  $\text{CH}_3\text{CN}$  (5 ml), DMF (5 ml) and  $\text{HNO}_3$  (65%, 0.2 mmol) and sealed in a pressure tube. The clear solution was heated at 85 °C in an oil bath for 72 h. The tube was cooled to room temperature over a period of 12 h and the colourless crystalline product was separated by filtration, washed with DMF (5 ml) and dried in air. Yield: 72% (based on ligand).

### Measurements

Powder X-ray diffraction (PXRD) data were collected under ambient conditions on a Rigaku ULTIMA IV diffractometer operated at 160 W (40 kV, 40 mA) for Cu  $\text{K}\alpha_1$  ( $\lambda = 1.5406$  Å). The IR spectrums were taken on a Thermo Scientific™ Nicolet™ iS™5 FT-IR Spectrometer with a resolution of 4  $\text{cm}^{-1}$  and 16 scans, as initial parameters.

### 3. PXRD of InOF-1

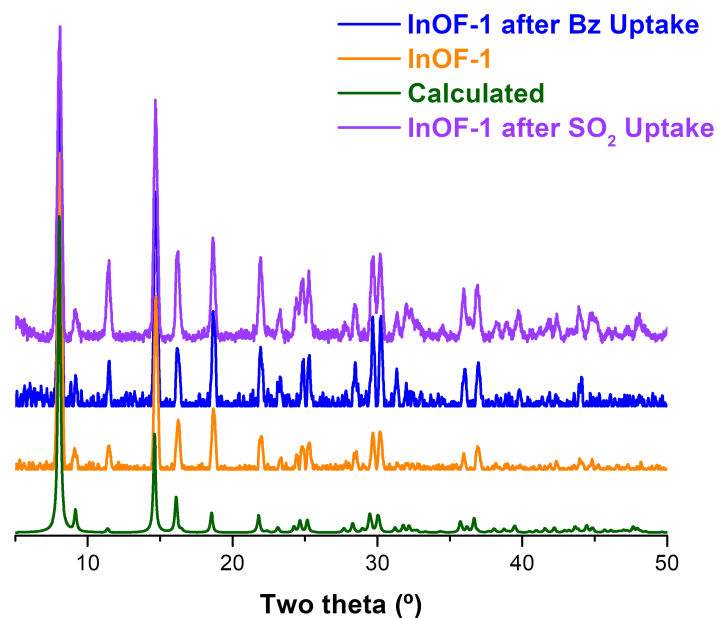

**Fig. S2.** Calculated PXRD pattern for InOF-1 (green), the as-synthesized (experimental) pattern (orange) for InOF-1, the pattern of InOF-1 after the benzene uptake (blue) and the pattern after SO<sub>2</sub> experiments (purple).

### 4. FT-IR spectrum of InOF-1

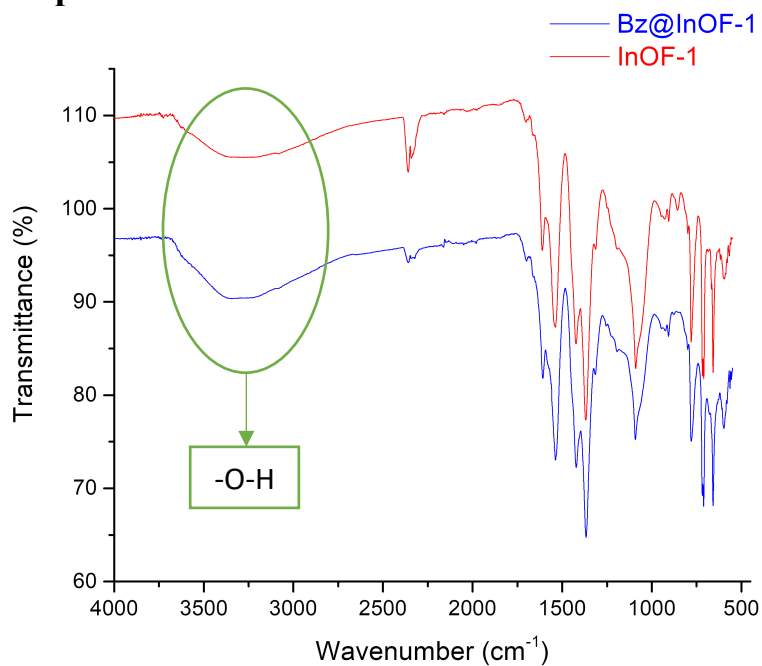

**Fig. S3.** IR spectra, before and after the preadsorption of benzene. Comparison of InOF-1 structure.

## 5. Determination of the isosteric enthalpy of adsorption for benzene

The enthalpy of adsorption,  $\Delta H_{ads}$ , was calculated from the analysis of benzene adsorption isotherms using the isosteric method by fitting a virial-type equation to both temperatures, 298 K and 308 K (Fig. S4).<sup>3</sup> The virial-type equation used to fit the both isotherms is:<sup>4</sup>

$$\ln(n/p) = A_0 + A_1n + A_2n^2 \dots \quad \text{Ec. (1)}$$

where  $p$  is the pressure,  $n$  is adsorbed amount on InOF-1 and,  $A_0$ ,  $A_1$ , etc. are virial coefficients.  $A_2$  and higher-order terms can be ignored.

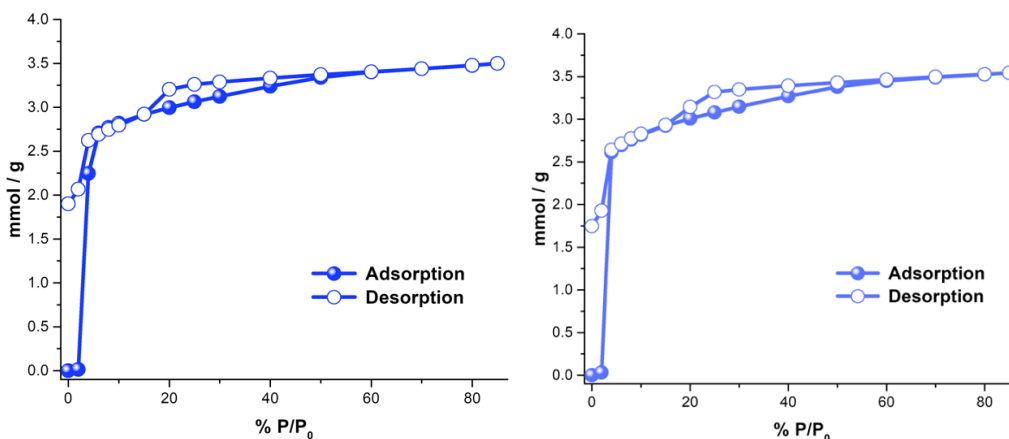

**Fig. S4.** Benzene ( $C_6H_6$ ) adsorption-desorption isotherms at 298 K (left) and 308 K (right) of InOF-1 from  $\%P/P_0 = 0$  to 85. Solid circles represent adsorption, and open circles show desorption.

A plot of  $\ln(n/p)$  vs  $n$  should give a straight line at low surface coverage (Fig. S5).<sup>5</sup>

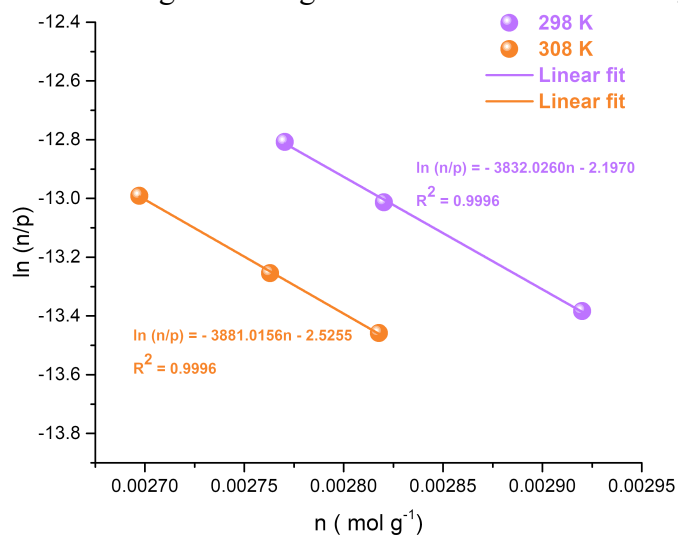

**Fig. S5.** Virial fitting plots for the adsorption of benzene on InOF-1 at 298 K (violet) and 308 K (orange).

Once obtained the plots,  $\Delta H_{ads}$ , was calculated with the help of the Clausius-Clapeyron equation,<sup>6</sup> obtaining a value of  $-25.1 \text{ kJ mol}^{-1}$ :

$$\Delta H_{ads} = R \left( \frac{T_1 * T_2}{T_1 - T_2} \right) \ln \left( \frac{P_1}{P_2} \right) \quad \text{Ec. ( 2)}$$

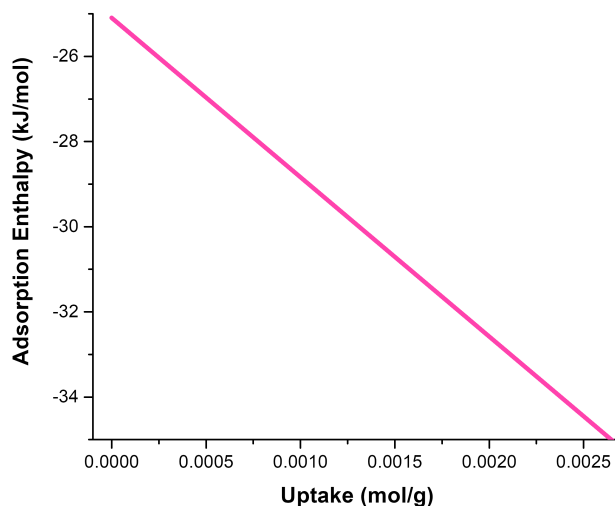

**Fig. S6.** Variation of adsorption enthalpy at low benzene loading for InOF-1.

Negative slope is indicative of homogeneous interactions due to, possibly, cooperative adsorptive-adsorptive interactions (via  $\pi - \pi$  stacking) rising with pressure increase.<sup>3</sup>

## 6. Uptake benzene on InOF-1 with H<sub>2</sub>O pre-adsorption

Fig. S7 shows that adsorption-desorption isotherm with a small amount of confined water (1.5 wt%) within InOF-1 structure (red curve) has the same form as the isotherm of InOF-1 fully activated (blue curve). However, in the desorption branch, the confinement of water enhanced the benzene that was retained by the InOF-1 by more 5.84 wt%. This phenomenon is most likely due to the interactions between benzene and water molecules. These molecules can interact with each other to form small complexes<sup>7</sup>, where the benzene can act as hydrogen bond donor and acceptor. The formation of water-benzene clusters can explain the observed differences in the desorption behaviour.

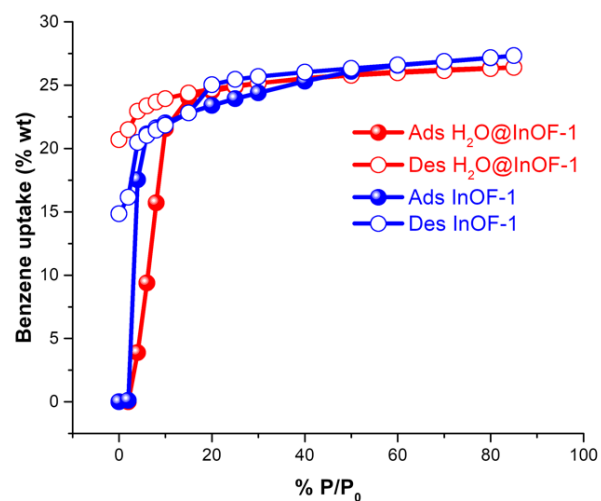

**Fig. S7.** Comparison of adsorption-desorption isotherms performed in InOF-1 (blue curve) and  $\text{H}_2\text{O}@/\text{InOF-1}$  (red curve) at 298 K from  $P/P_0 = 0$  to 85.

## 7. Computational calculations

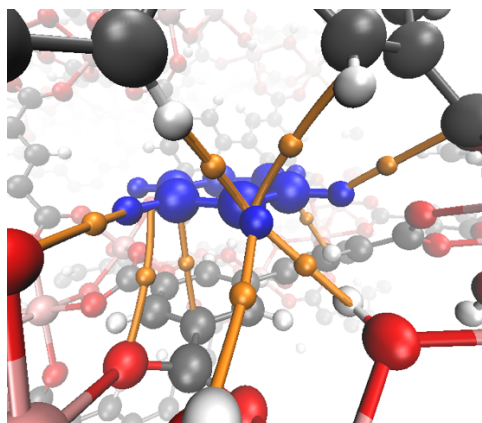

**Fig. S8.** Molecular graph of the  $\text{Bz}@/\text{InOF.1}$  system. The bond critical points and bond paths are depicted by orange points and lines, respectively. Benzene molecule is shown in blue.

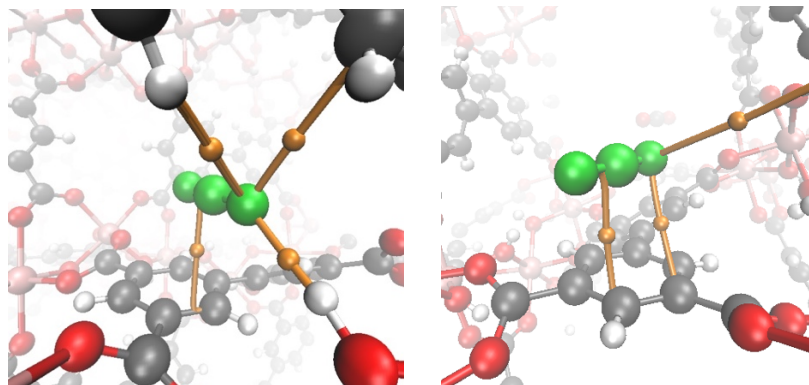

**Fig. S9.** Molecular graphs of  $\text{CO}_2 \cdots \text{InOF-1a}$  (left) and  $\text{CO}_2 \cdots \text{InOF-1b}$  (right). The bond critical points and bond paths are depicted by orange points and lines, respectively.  $\text{CO}_2$  molecule is shown in green.

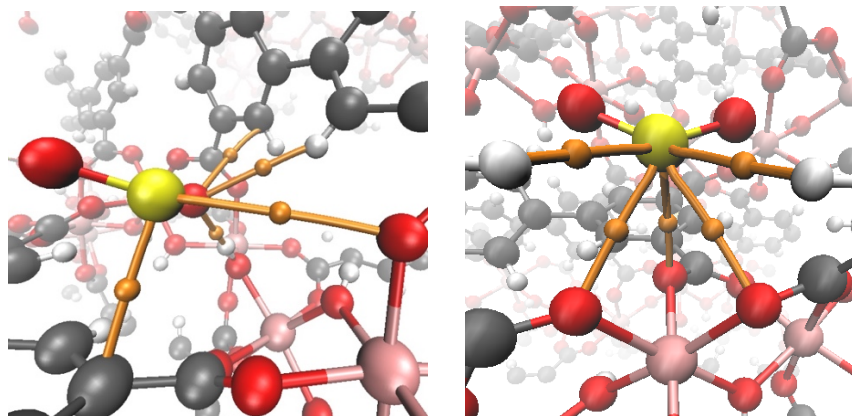

**Fig. S10.** Molecular graphs of  $\text{SO}_2 \cdots \text{InOF-1a}$  (left) and  $\text{SO}_2 \cdots \text{InOF-1b}$  (right). The bond critical points and bond paths are depicted by orange points and lines, respectively.

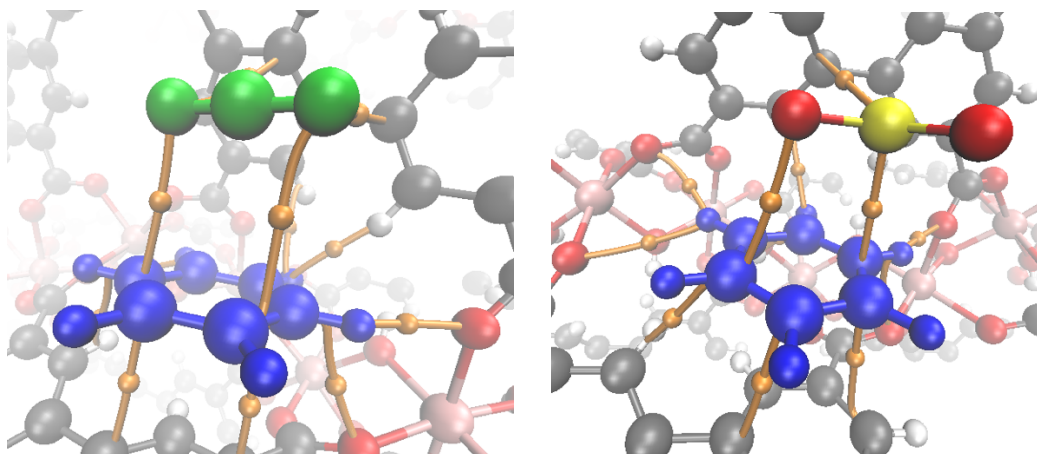

**Fig. S11.** Molecular graphs of  $\text{CO}_2 \cdots \text{Bz@InOF-1b}$  (left) and  $\text{SO}_2 \cdots \text{Bz@InOF-1b}$  (right). The bond critical points and bond paths are depicted by orange points and lines, respectively. Benzene and  $\text{CO}_2$  molecules are shown in blue and green, correspondingly.

## References

1. E. Sánchez-González, E. González-Zamora, D. Martínez-Otero, V. Jancik and I. A. Ibarra, *Inorg. Chem.*, 2017, **56**, 5863–5872.
2. Qian, J.; Jiang, F.; Yuan, D.; Wu, M., Zhang, S., Zhang, L. and Hong, M. Highly Selective Carbon Dioxide Adsorption in a Water-Stable Indium–organic Framework Material. *Chem. Commun.* 2012, **48**, 9696.
3. Rouquerol F., Rouquerol J., Sing K. S. W., Llewellyn P. and Maurin, G. *Adsorption by Powders and Porous Solids: Principles, Methodology and Applications*, 2nd ed.; Academic Press: Oxford, UK, 2014.
4. *CRC Handbook of Chemistry and Physics*, 85th ed.; Lide, D. R., Ed.; CRC Press: Boca Raton FL, 2004.
5. Nuñez A. J., Chang M. S., Ibarra I. A. and Humphrey, S. M. Tuning the Host-Guest Interactions in a Phosphine Coordination Polymer through Different Types of post-Synthetic Modification. *Inorg. Chem.*, 2014, **53**, 282–288.
6. Shi J., Zhao Z., Xia Q., Li, Y. and Li Z. Adsorption and Diffusion of Ethyl Acetate on the Chromium-Based Metal–Organic Framework MIL-101. *J. Chem. Eng. Data* **2011**, 56, 3419–3425.
7. Slipchenko, L. and Gordon, M. Water-Benzene Interactions: An Effective Fragment Potential and Correlated Quantum Chemistry Study. *J. Phys. Chem. A*, 2009, **113**, 10, 2092-2102
